# Supplementary material for: Bioactive Peptides from Liquid Milk Protein Concentrate by Sequential Tryptic and Microbial Hydrolysis
Source: MDPI journal article supplement (doi:10.3390/pr9101688), 2021-09-22
Supplement: s1 [file s1]

Archive with 1 entries (1 files):
- processes-1278759-supplementary.pdf
